# Supplementary material for: A 2D → 2D polyrotaxane lanthanide–organic framework showing field-induced single-molecule magnet behaviour
Source: Royal Society of Chemistry journal article supplement (doi:10.1039/c4ra06802e), 2014-01-01
Supplement: c4ra06802e1.pdf [file c4ra06802e1.pdf]

## Supporting Information for

### A 2D→2D Polyrotaxane Lanthanide–Organic Framework Exhibiting Slow Magnetic Relaxation Behavior

Cai-Ming Liu,\* De-Qing Zhang, and Dao-Ben Zhu

*Beijing National Laboratory for Molecular Sciences, Center for Molecular Science,  
Institute of Chemistry, Chinese Academy of Sciences Beijing 100190, P.R. China*

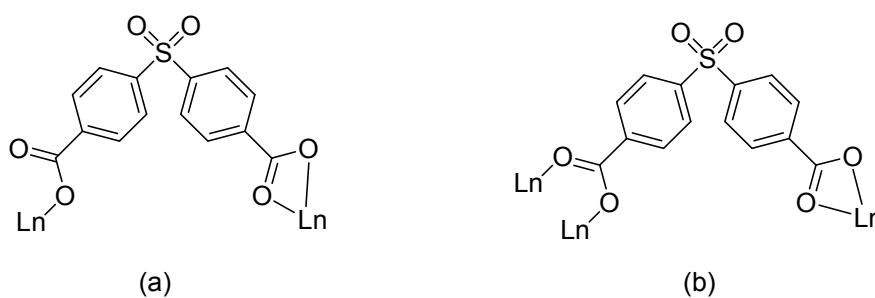

**Scheme S1.** Coordination modes of the  $L^{2-}$  ligands.

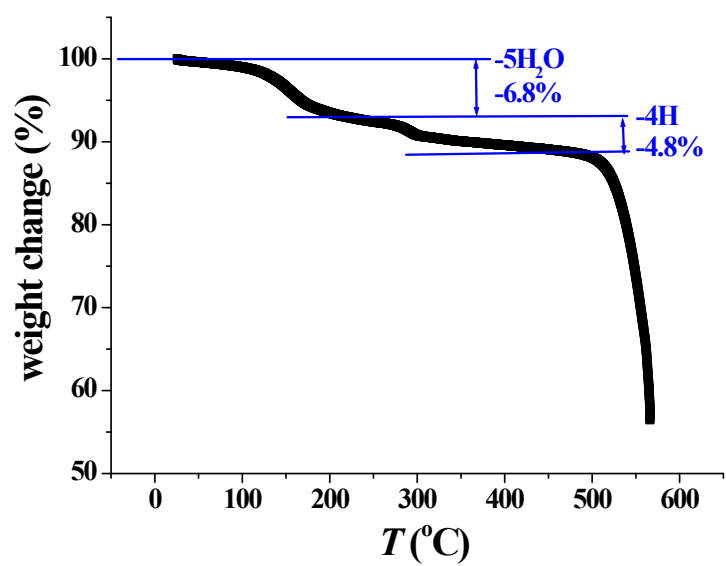

**Fig. S1.** TGA of **1** measured under a nitrogen atmosphere in the 25-565 °C temperature range and at a scan rate of 10 °Cmin<sup>-1</sup>.

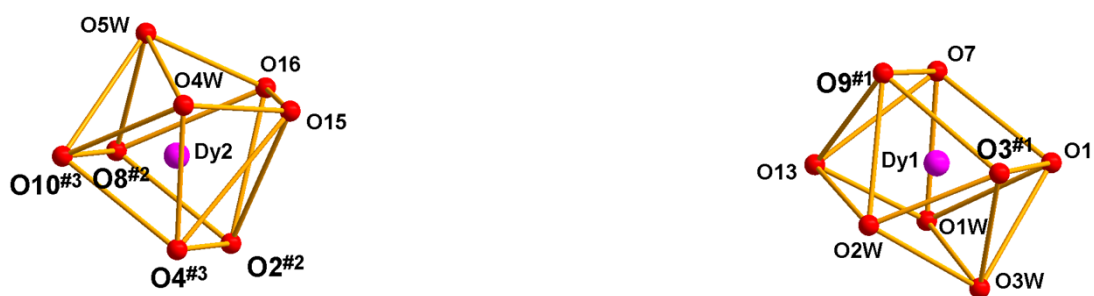

**Figure S2.** Coordination geometries of Dy1 and Dy2 in **1**.

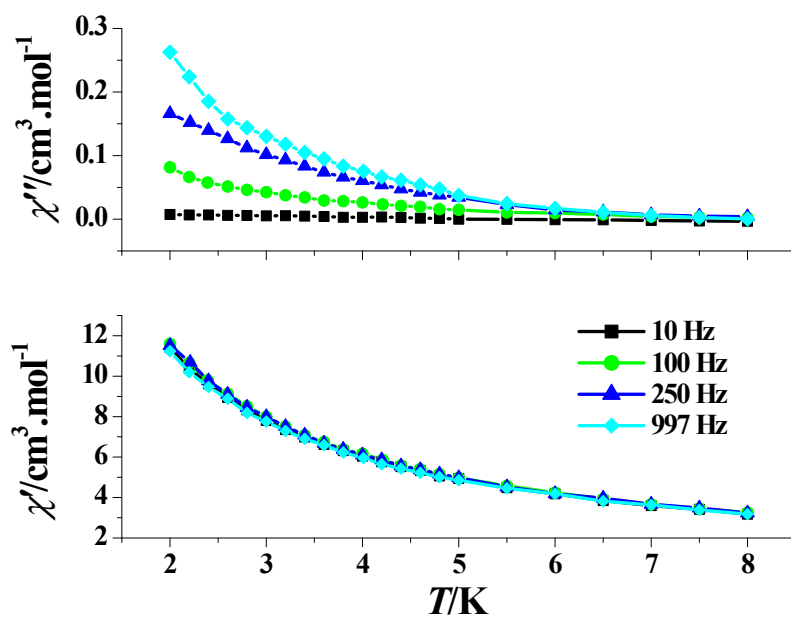

**Figure S3.** AC susceptibilities measured in a 2.5 Oe ac magnetic field with a zero dc-field for **1**.

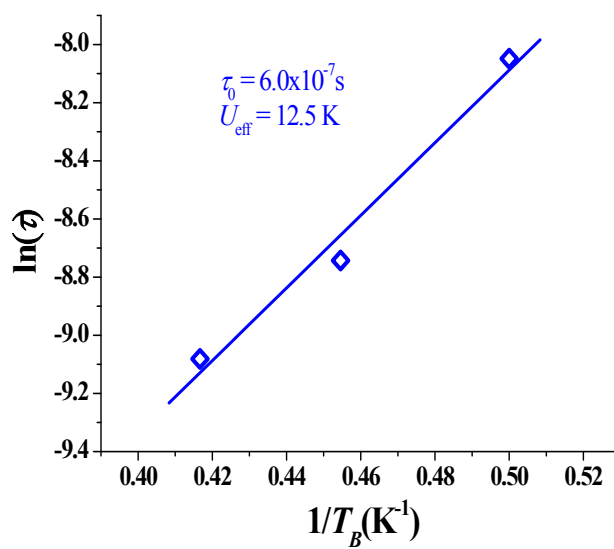

**Figure S4.** Plot of  $\ln(\tau)$  versus  $1/T_B$  for **1**, the solid line represents the fitting with the Arrhenius law.

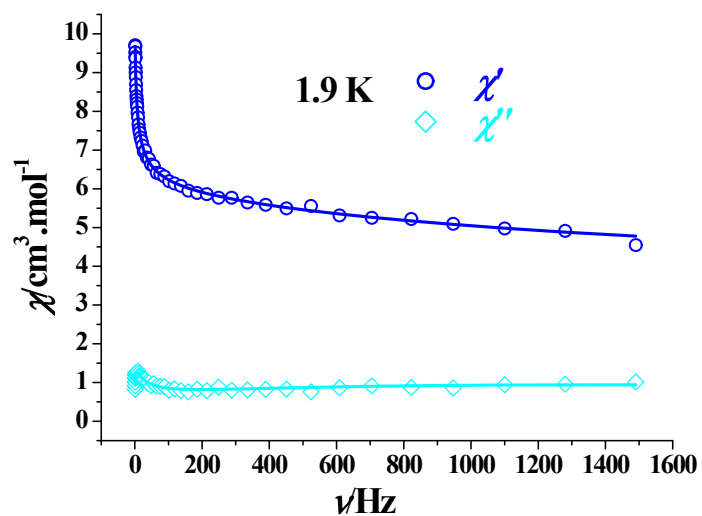

**Figure S5.** Frequency dependence of the in-phase ( $\chi'$ , top) and out-of-phase ( $\chi''$ , bottom) ac susceptibility of **1** at 1.9 K. the solid lines represent the best fitting with the sum of two modified Debye functions.

**Table S1.** Linear combination of two modified Debye model fitting parameters at 1.9 K of **1** under 2000 Oe DC field.

| $T(\text{K})$ | $\chi_2(\text{cm}^3 \cdot \text{mol}^{-1})$ | $\chi_1(\text{cm}^3 \cdot \text{mol}^{-1})$ | $\chi_0(\text{cm}^3 \cdot \text{mol}^{-1})$ | $\tau_1(\text{s})$ | $\alpha_1$ | $\tau_2(\text{s})$ | $\alpha_2$ |
|---------------|---------------------------------------------|---------------------------------------------|---------------------------------------------|--------------------|------------|--------------------|------------|
| 1.9           | 10.92                                       | 8.30                                        | 3.14                                        | 0.02962            | 0.435      | 0.00008            | 0.305      |
